# Supplementary material
Source: PubMed Central journal article supplement (PMC8015863)
Supplement: jamaneurol-e204418-s001.pdf [file jamaneurol-e204418-s001.pdf]

## Supplementary Online Content

Nguyen TTM, van den Wijngaard IR, Bosch J, et al. Comparison of prehospital scales for predicting large anterior vessel occlusion in the ambulance setting. *JAMA Neurol*. Published online November 30, 2020. doi:10.1001/jamaneurol.2020.4418

**eTable 1.** Comparing Patients With and Without Application Data

**eTable 2.** Stroke Logistics and In-Hospital Performance Metrics in PSC vs CSC Presented Patients

**eTable 3.** Comparing Accuracies of the Prediction Scales According to Prespecified Cut Points

**eTable 4.** Comparison of Full Range Accuracy of the Prediction Scales

**eFigure.** Allocation of Acute Stroke Code Patients

This supplementary material has been provided by the authors to give readers additional information about their work.

**eTable 1. Comparing Patients With and Without Application Data**

|                                                                                                                                                                                                                             | <b>Total No. (%)<br/>(n = 2449)</b> | <b>Patients with<br/>application data,<br/>No. %<br/>(n = 2007)</b> | <b>Patients<br/>without<br/>application<br/>data, No. %<br/>(n = 442)</b> | <b>P value</b> |
|-----------------------------------------------------------------------------------------------------------------------------------------------------------------------------------------------------------------------------|-------------------------------------|---------------------------------------------------------------------|---------------------------------------------------------------------------|----------------|
| <b>Age, mean (SD), y</b>                                                                                                                                                                                                    | 70.9 (14.7)                         | 71.1 (14.9)                                                         | 70.4 (14.3)                                                               | .26            |
| <b>Male sex</b>                                                                                                                                                                                                             | 1247/2449 (50.9)                    | 1021/2007 (50.0)                                                    | 226/442 (51.1)                                                            | .92            |
| <b>Hospital admission</b>                                                                                                                                                                                                   |                                     |                                                                     |                                                                           |                |
| NIHSS score <sup>a</sup> , median (IQR)                                                                                                                                                                                     | 4 (2–9)                             | 4 (2–8)                                                             | 4 (2–10)                                                                  | .31            |
| sLAVO                                                                                                                                                                                                                       | 198/2449 (8.1)                      | 158/2007 (7.9)                                                      | 40/442 (9.0)                                                              | .41            |
| <b>Final diagnosis</b>                                                                                                                                                                                                      |                                     |                                                                     |                                                                           |                |
| Ischemic stroke                                                                                                                                                                                                             | 978/2449 (39.9)                     | 831/2007 (41.4)                                                     | 147/442 (33.3)                                                            | <.001          |
| Intracerebral hemorrhage                                                                                                                                                                                                    | 202/2440 (8.2)                      | 149/2007 (7.4)                                                      | 53/442 (12.0)                                                             |                |
| Transient ischemic attack                                                                                                                                                                                                   | 319/2449 (13.0)                     | 274/2007 (13.7)                                                     | 45/442 (10.2)                                                             |                |
| Stroke mimic                                                                                                                                                                                                                | 950/2449 (38.8)                     | 753/2007 (37.5)                                                     | 197/442 (44.6)                                                            |                |
| Abbreviations: NIHSS, National Institute of Health Stroke Scale; sLAVO, symptomatic large anterior vessel occlusion.<br><sup>a</sup> Only provided for stroke patients (i.e. ischemic stroke and intracerebral hemorrhage). |                                     |                                                                     |                                                                           |                |

**eTable 2. Stroke Logistics and In-Hospital Performance Metrics in PSC vs CSC Presented Patients**

|                                                                                                                                                                                                                                                                | <b>Total, No. (%)<br/>(n = 158)</b> | <b>sLAVO presented in<br/>PSC, No. (%)<br/>(n = 32)</b> | <b>sLAVO presented in<br/>CSC, No. (%)<br/>(n = 126)</b> | <b>P value</b> |
|----------------------------------------------------------------------------------------------------------------------------------------------------------------------------------------------------------------------------------------------------------------|-------------------------------------|---------------------------------------------------------|----------------------------------------------------------|----------------|
| <b>Stroke logistics</b>                                                                                                                                                                                                                                        |                                     |                                                         |                                                          |                |
| Transferred from PSC to CSC<br>for EVT                                                                                                                                                                                                                         | 26/158 (17)                         | 26/32 (81)                                              | NA                                                       | NA             |
| <b>In-hospital performance metrics</b>                                                                                                                                                                                                                         |                                     |                                                         |                                                          |                |
| DNT, median (IQR), min                                                                                                                                                                                                                                         | 24 (18–33)                          | 26 (19–34)                                              | 24 (18–33)                                               | .79            |
| DGT, median (IQR), min                                                                                                                                                                                                                                         | 72 (54–105)                         | 114 (103–140)                                           | 61 (51–81)                                               | <.001          |
| Abbreviations: sLAVO, symptomatic large anterior vessel occlusion; PSC, primary stroke center; CSC, comprehensive stroke center; NA, not applicable; EVT, endovascular thrombectomy. DNT, door-to-needle time; DGT, <i>first</i> -door-to-groin puncture time. |                                     |                                                         |                                                          |                |

**eTable 3. Comparing Accuracies of the Prediction Scales According to Prespecified Cut Points**

| Prediction scale  | Accuracy <sup>a</sup> | C-STAT ≥2 | PASS ≥2 | G-FAST ≥3 | FAST-ED ≥4 | RACE ≥5 | LAMS ≥4 |
|-------------------|-----------------------|-----------|---------|-----------|------------|---------|---------|
| <b>C-STAT ≥2</b>  | 0.79 (0.77-0.81)      | NA        |         |           |            |         |         |
| <b>PASS ≥2</b>    | 0.81 (0.79-0.83)      | 0.03      | NA      |           |            |         |         |
| <b>G-FAST ≥3</b>  | 0.82 (0.81-0.84)      | 0.76      | 0.13    | NA        |            |         |         |
| <b>FAST-ED ≥4</b> | 0.83 (0.81-0.85)      | 0.06      | 0.49    | 0.19      | NA         |         |         |
| <b>RACE ≥5</b>    | 0.88 (0.86-0.89)      | <0.001    | 0.02    | <0.001    | 0.001      | NA      |         |
| <b>LAMS ≥4</b>    | 0.89 (0.87-0.90)      | <0.001    | <0.001  | <0.001    | <0.001     | 0.51    | NA      |

Abbreviations: NA, not applicable; C-STAT, Cincinnati stroke triage assessment tool; PASS, Prehospital acute stroke severity; G-FAST, Gaze-face-arm-speech-time; FAST-ED, Face-arm-speech-time-eye deviation-denial/neglect RACE, Rapid arterial occlusion evaluation; LAMS, Los Angeles Motor Scale.  
<sup>a</sup> Accuracy at cutoff point: ((True positives + true negatives)/total number of patients).

**eTable 4. Comparison of Full Range Accuracy of the Prediction Scales**

| Prediction scale | AUC (95% CI)     | C-STAT | PASS   | GACE   | RACE  | LAMS | G-FAST | FAST-ED | NIHSS |
|------------------|------------------|--------|--------|--------|-------|------|--------|---------|-------|
| <b>C-STAT</b>    | 0.70 (0.64-0.76) | NA     |        |        |       |      |        |         |       |
| <b>PASS</b>      | 0.73 (0.68-0.78) | 0.19   | NA     |        |       |      |        |         |       |
| <b>GACE</b>      | 0.73 (0.69-0.78) | 0.27   | 0.85   | NA     |       |      |        |         |       |
| <b>RACE</b>      | 0.75 (0.69-0.82) | 0.05   | 0.08   | 0.04   | NA    |      |        |         |       |
| <b>LAMS</b>      | 0.76 (0.71-0.81) | 0.05   | 0.07   | 0.18   | 0.40  | NA   |        |         |       |
| <b>G-FAST</b>    | 0.77 (0.72-0.82) | 0.04   | 0.01   | 0.01   | 0.51  | 0.48 | NA     |         |       |
| <b>FAST-ED</b>   | 0.80 (0.74-0.85) | 0.01   | 0.001  | 0.02   | 0.53  | 0.10 | 0.46   | NA      |       |
| <b>NIHSS</b>     | 0.82 (0.78-0.85) | <0.001 | <0.001 | <0.001 | 0.001 | 0.01 | 0.001  | 0.20    | NA    |

Abbreviations: AUC, area under the curve; NA, not applicable; C-STAT, Cincinnati stroke triage assessment tool; PASS, Prehospital acute stroke severity; GACE, Gace, facial Asymmetry, level of Consciousness, Extinction/inattention; RACE, Rapid arterial occlusion evaluation; LAMS, Los Angeles Motor Scale; G-FAST, Gaze-face-arm-speech-time; FAST-ED, Face-arm-speech-time-eye deviation-denial/neglect; NIHSS, National Institute of Health Stroke Scale.

**eFigure. Allocation of Acute Stroke Code Patients**

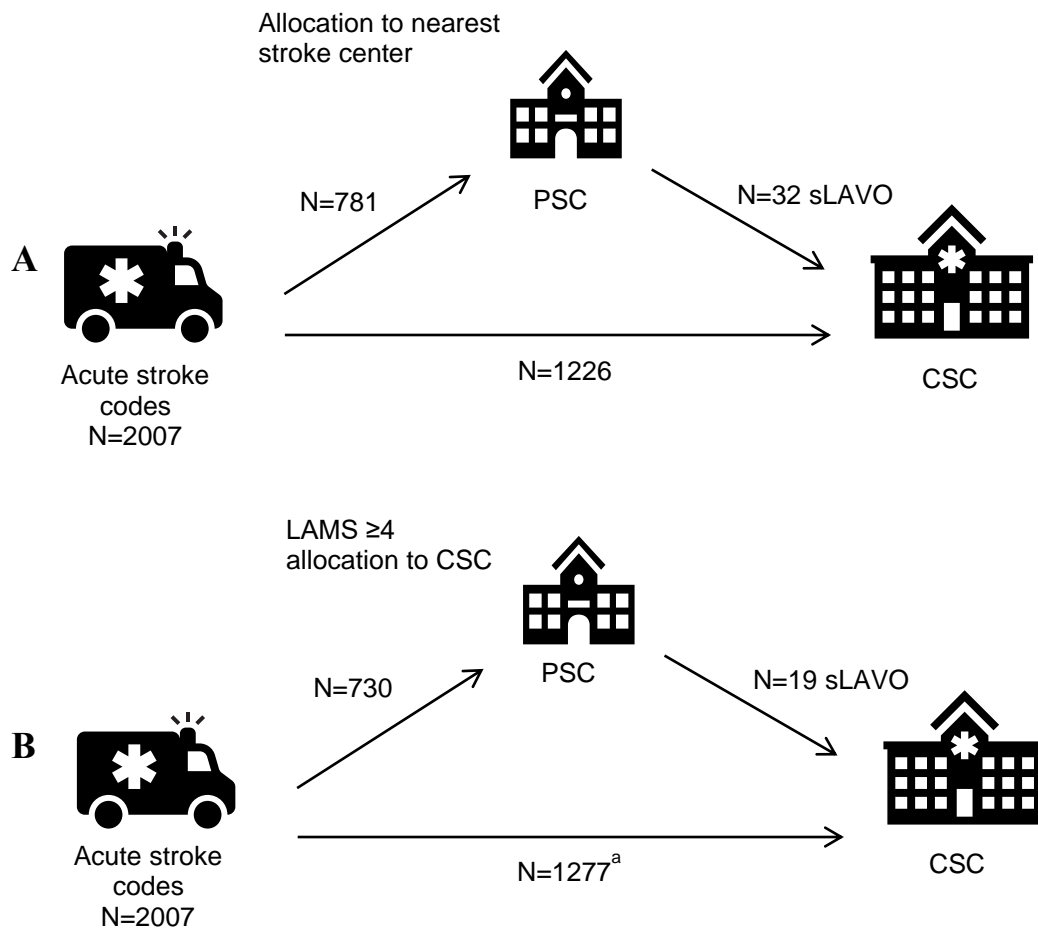

**Figure legend**

**A:** Real scenario of patient allocation in our cohort.

**B:** Hypothetical scenario for patient allocation based on LAMS score in our cohort.

<sup>a</sup>13 patients with sLAVO would directly be allocated to a CSC, 17 IVT-treated patients would have unnecessarily by-passed a PSC and 38 patients without sLAVO would have been allocated to a CSC (including 6 patients with clinically severe ICH).
